# Supplementary material for: Light induced stimulation and delay of cardiac activity
Source: Royal Society of Chemistry journal article supplement (doi:10.1039/c003091k), 2010-01-01
Supplement: c003091k.pdf [file c003091k.pdf]

## Supplementary information

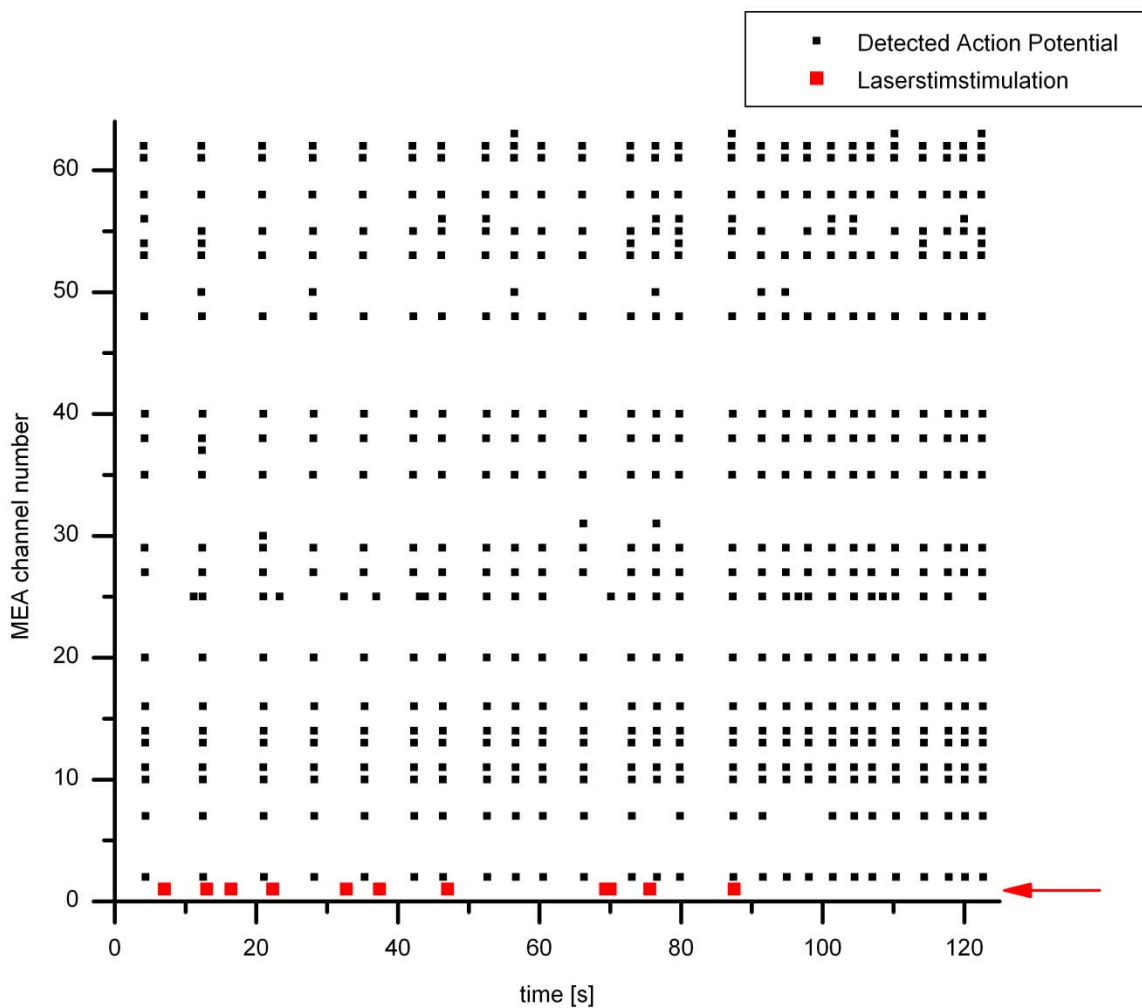

Sup I: AP event vs. time for light increased refractory period. On channel 1 (indicated by arrow) the timestamp of the stimulation can be seen (red). Stimulation was timed to occur after the APs. In the beginning of the recording every AP was followed by a light pulse, during the middle of the recording only a few flashes were administered and at the end no light flashes were applied.
